# Supplementary material for: Real-time monitoring of etoposide prodrug activated by hydrogen peroxide with improved safety
Source: Royal Society of Chemistry journal article supplement (doi:10.1039/c9tb02041a), 2019-01-01
Supplement: c9tb02041a1.pdf [file c9tb02041a1.pdf]

# Real-time Monitoring Etoposide Prodrug Activated by Hydrogen Peroxide with Improved Safety

Jiawen Zhu, Jingting Chen, Dongmei Song, Wenda Zhang, Jianpeng Guo, Guiping Cai, Yuhao Ren, Chengying Wan, Lingyi Kong\* and Wenying Yu\*

\*Jiangsu Key Laboratory of Bioactive Natural Product Research and State Key Laboratory of Natural Medicines, China Pharmaceutical University, 24 Tong Jia Xiang, Nanjing 210009, People's Republic of China.

Corresponding author: [cpu\\_lykong@126.com](mailto:cpu_lykong@126.com) (L. Kong), [ywy@cpu.edu.cn](mailto:ywy@cpu.edu.cn) (W. Yu)

## Supporting Information Contents

|                                                                                                                                                            |    |
|------------------------------------------------------------------------------------------------------------------------------------------------------------|----|
| 1. Synthetic procedure of <b>6YT</b> ( <i>Scheme S1</i> ).....                                                                                             | S2 |
| 2. The spectra of <sup>1</sup> H NMR, <sup>13</sup> C NMR ( <i>Figure S1-S7</i> ).....                                                                     | S3 |
| 3. HR-ESI-MS spectrum of <b>6YT</b> ( <i>Figure S8</i> ).....                                                                                              | S6 |
| 4. pH dependence of <b>6YT</b> in the absence and presence of H <sub>2</sub> O <sub>2</sub> ( <i>Figure S9</i> ).....                                      | S7 |
| 5. Monitoring of Etoposide release by RP-HPLC ( <i>Figure S10</i> ).....                                                                                   | S7 |
| 6. Fluorescence image of compound <b>6YT</b> activated by different concentration of exogenous H <sub>2</sub> O <sub>2</sub> ( <i>Figure S11</i> ).....    | S8 |
| 7. Fluorescence image of compound <b>6YT</b> activated by endogenous H <sub>2</sub> O <sub>2</sub> in different cell lines. ( <i>Figure S12-S15</i> )..... | S9 |

## 1. Synthetic procedure of 6YT

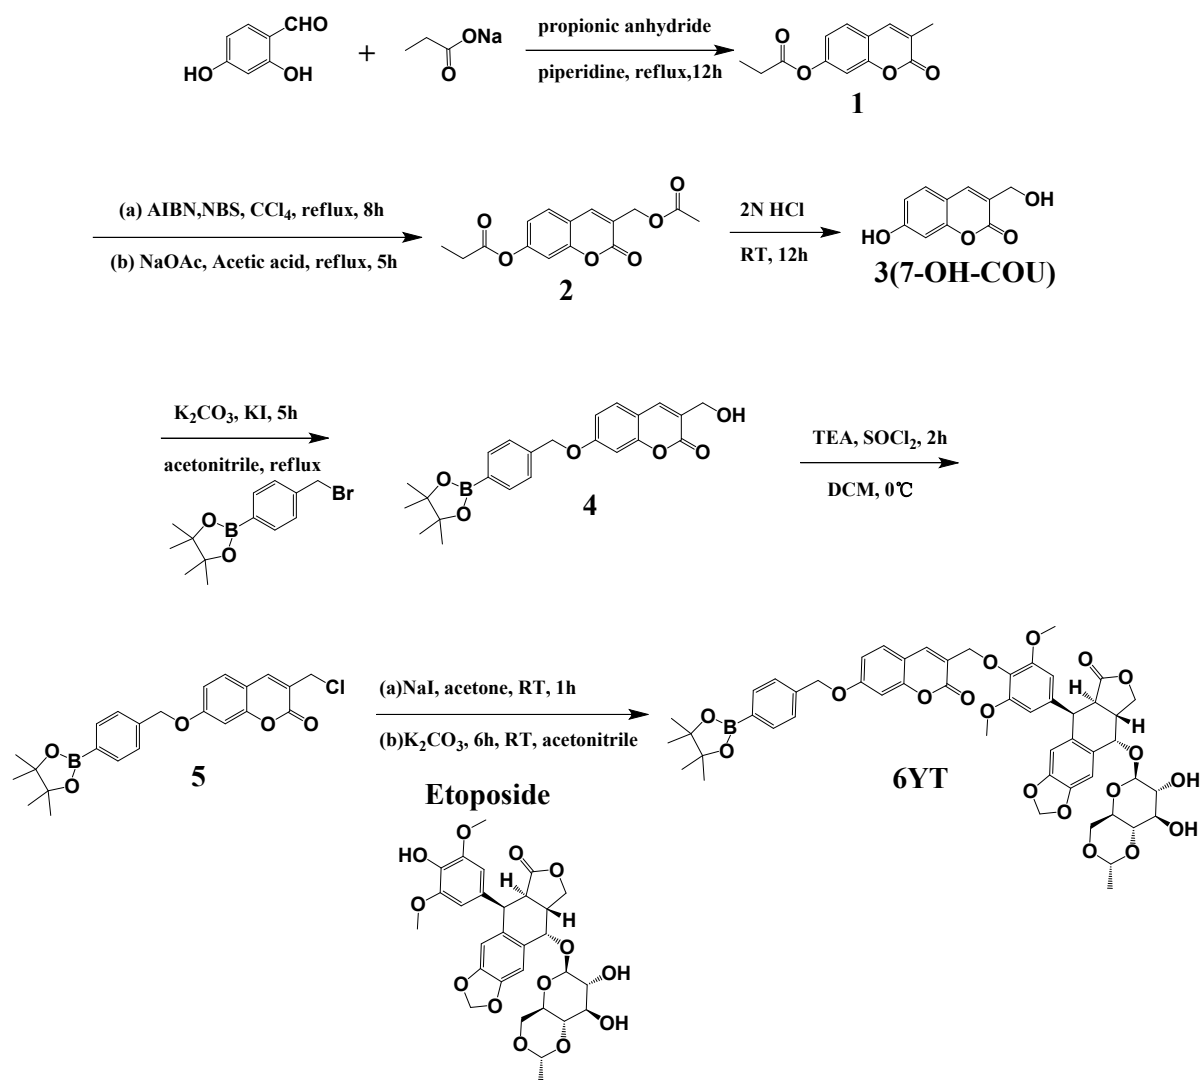

**Scheme S1.** Synthesis of **6YT**

## 2. The spectra of $^1\text{H}$ NMR, $^{13}\text{C}$ NMR

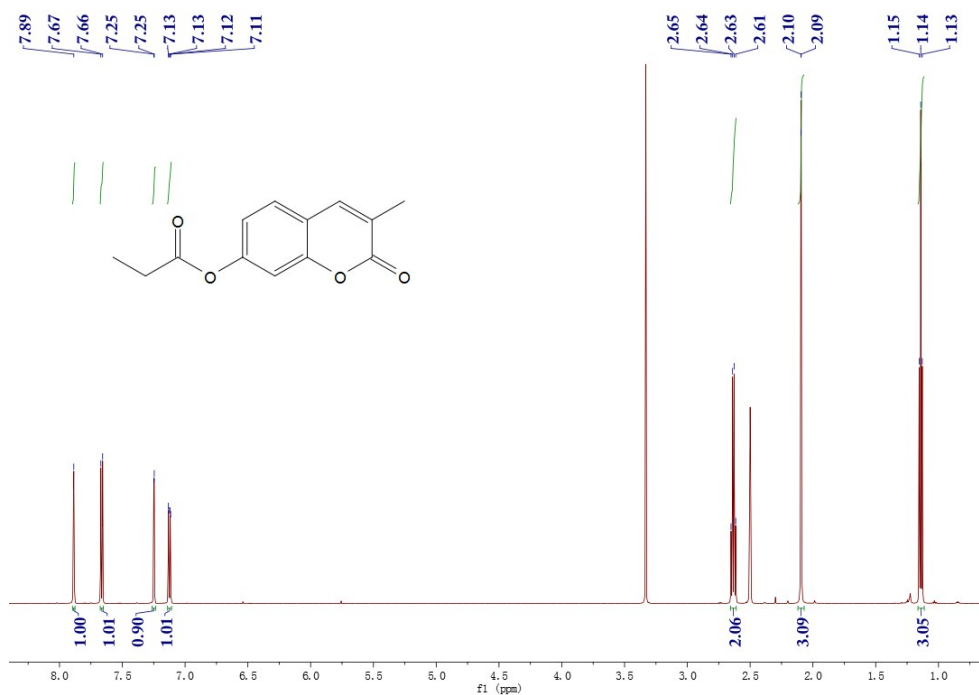

**Figure S1.**  $^1\text{H}$  NMR spectrum (600 MHz) of compound **1** in  $\text{DMSO}-d_6$ .

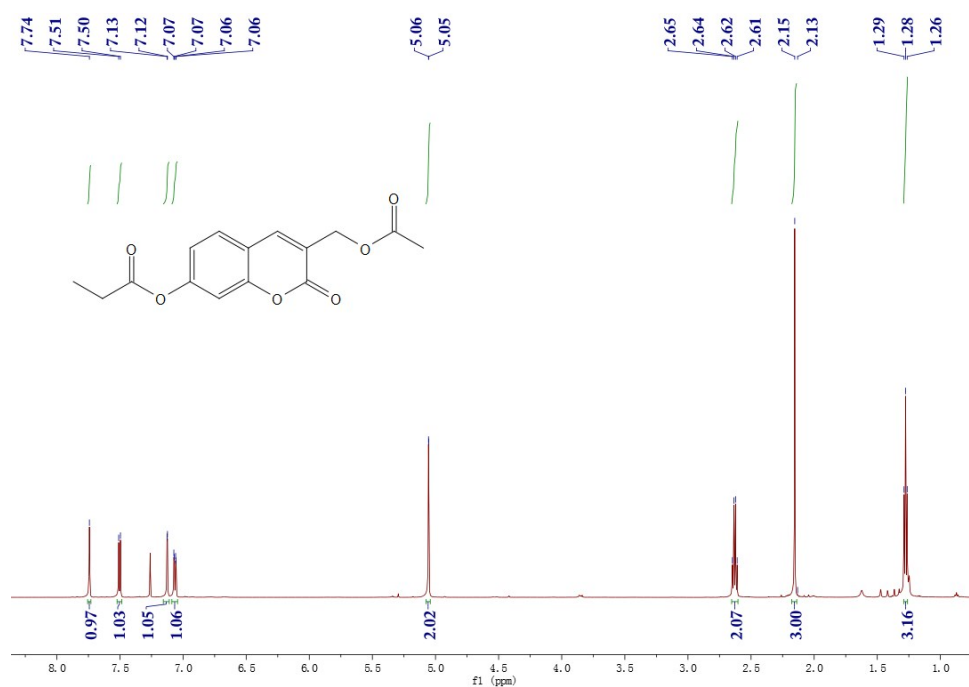

**Figure S2.**  $^1\text{H}$  NMR spectrum (600 MHz) of compound **2** in  $\text{CDCl}_3$ .

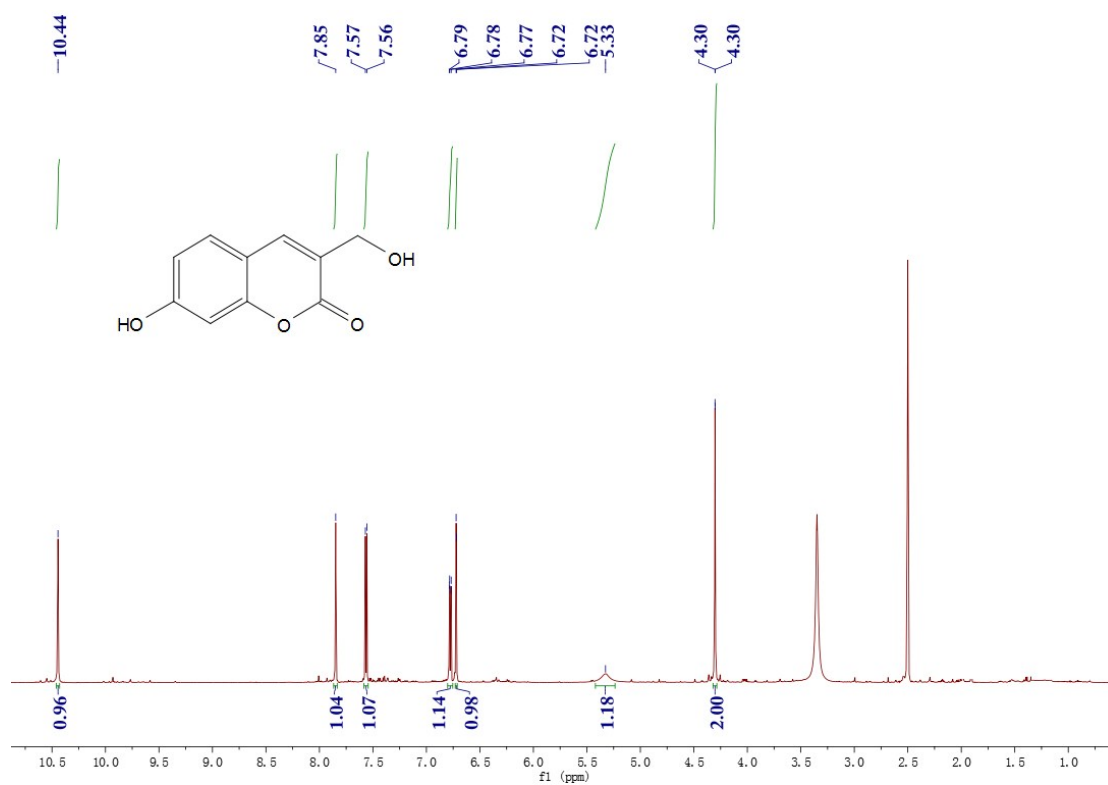

**Figure S3.** <sup>1</sup>H NMR spectrum (600 MHz) of compound **3** in DMSO-*d*<sub>6</sub>.

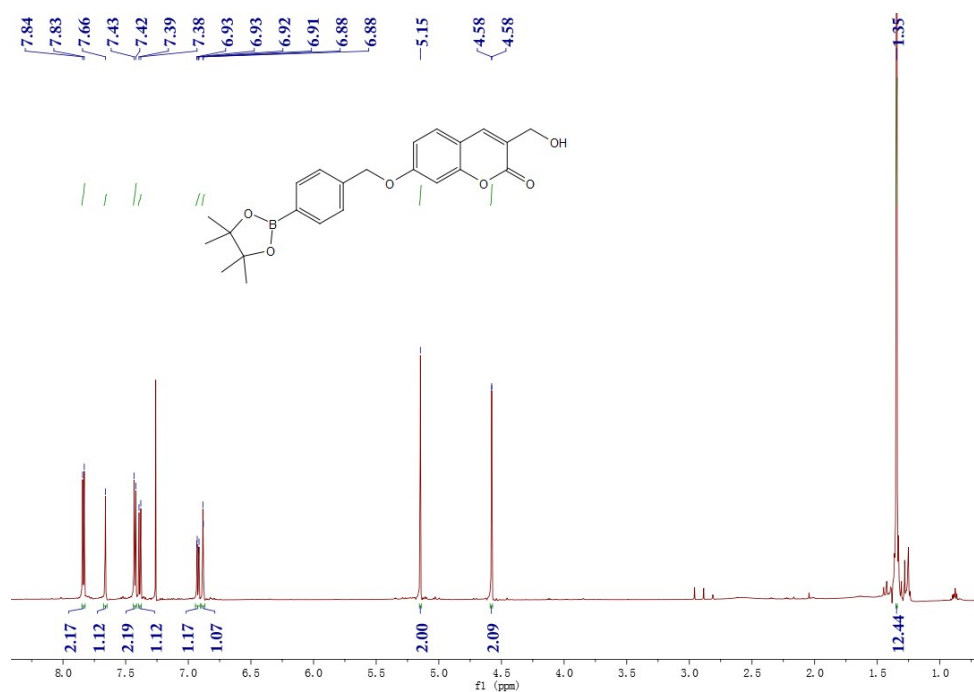

**Figure S4.** <sup>1</sup>H NMR spectrum (600 MHz) of compound **4** in CDCl<sub>3</sub>.

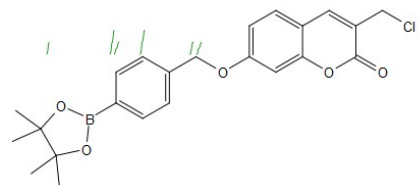

**Figure S5.**  $^1\text{H}$  NMR spectrum (500 MHz) of compound **5** in  $\text{DMSO}-d_6$ .

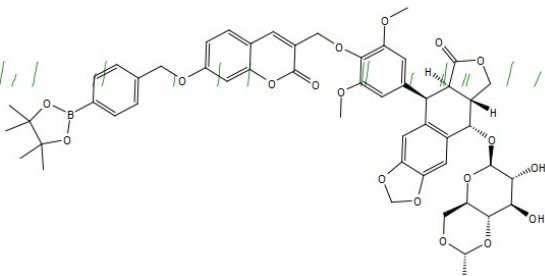

**Figure S6.**  $^1\text{H}$  NMR spectrum (500 MHz) of **6YT** in  $\text{DMSO}-d_6$ .

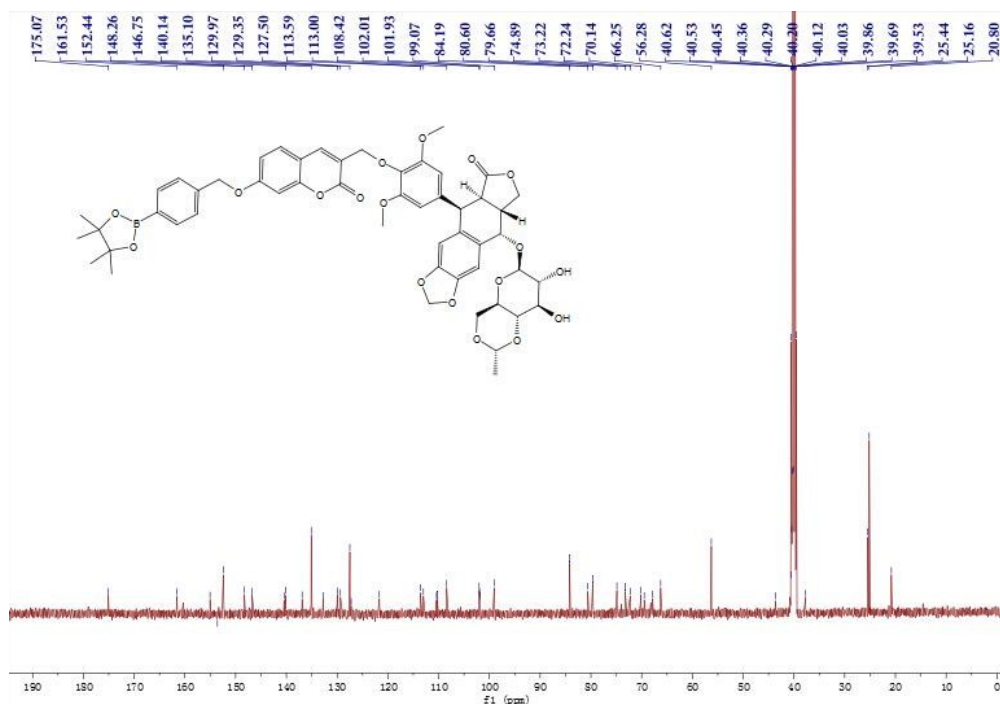

**Figure S7.**  $^{13}\text{C}$  NMR spectrum (126 MHz) of **6YT** in  $\text{DMSO-}d_6$ .

### 3. HR-ESI-MS spectrum of compound **6YT**

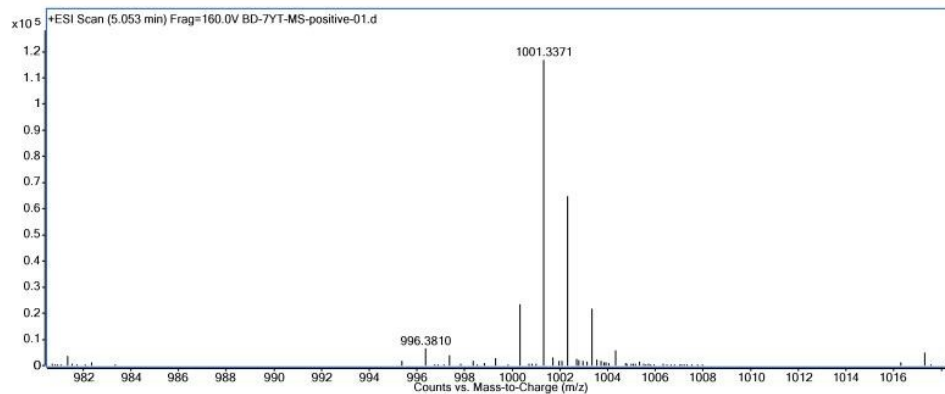

#### Elemental Composition Calculator

| Target m/z:                                             | 1001.3371                                        | Result type: | Positive ions | Species: | $[\text{M}+\text{Na}]^+$ |
|---------------------------------------------------------|--------------------------------------------------|--------------|---------------|----------|--------------------------|
| Elements:                                               | C (0-80); H (0-120); O (0-30); Na (0-5) ; B(0-5) |              |               |          |                          |
| Ion Formula                                             | Calculated m/z                                   |              | PPM Error     |          |                          |
| $\text{C}_{52}\text{H}_{55}[\text{11B}]\text{NaO}_{18}$ | 1001.3374                                        |              | 0.23          |          |                          |

**Figure S8.** HR-ESI-MS spectrum of compound **6YT**.

#### 4. pH dependence of 6YT in the absence and presence of H<sub>2</sub>O<sub>2</sub>

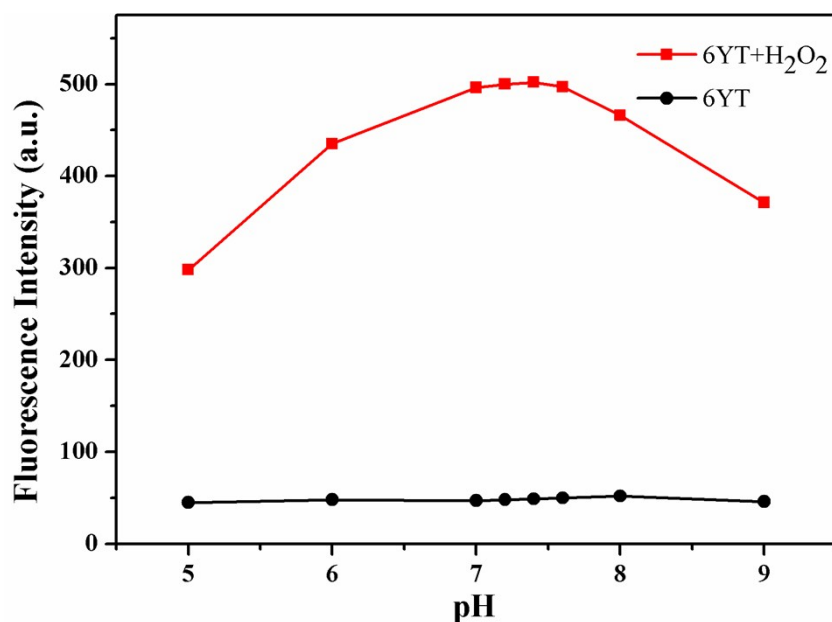

**Figure S9.** Fluorescence emission intensity (458 nm) of 6YT (10  $\mu$ M) and 6YT + H<sub>2</sub>O<sub>2</sub> (300  $\mu$ M) to various pH (5.0-9.0) in PBS buffer (10 mM, pH 7.4, 0.1% DMSO) after incubation for 60 min.

#### 5. Monitoring of Etoposide release by RP-HPLC

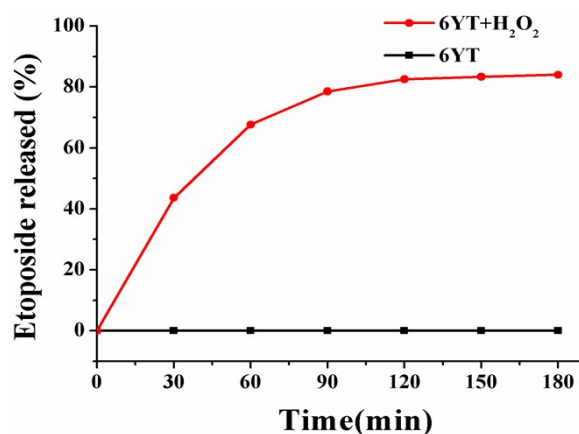

**Figure S10.** Etoposide release (%) from 6YT (100  $\mu$ M) in PBS (pH 7.4) in the presence (red squares) or absence (black circles) of H<sub>2</sub>O<sub>2</sub> (10 mM).

## 6. Fluorescence image of compound 6YT activated by different concentration of exogenous $\text{H}_2\text{O}_2$

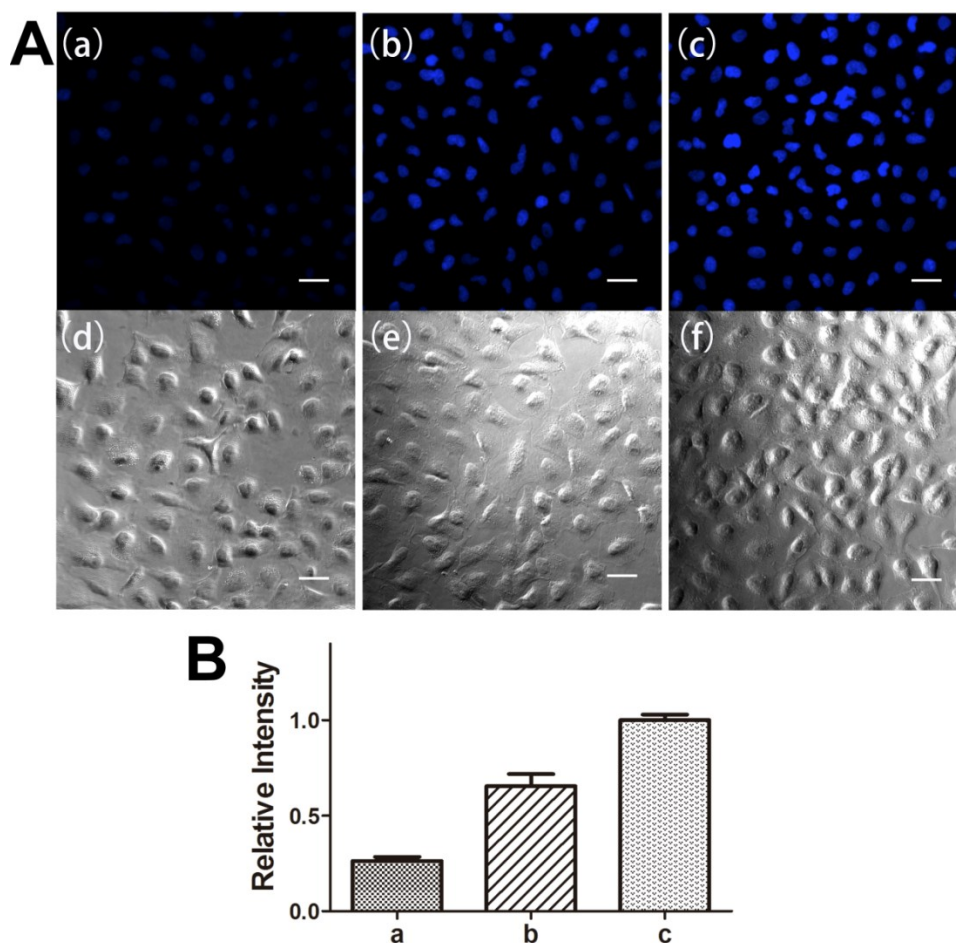

**Figure S11.** (A) Fluorescence images of A549 cell lines treated with increasing concentrations of  $\text{H}_2\text{O}_2$  (0, 100 and 200  $\mu\text{M}$ ) for 2h after incubated with compound **6YT** (10  $\mu\text{M}$ ) for another 2 h(a-c), and the bright field(d-f). Scale bar = 20  $\mu\text{m}$ . (B) The relative fluorescence intensities of a-c were measured at three regions in each dish. Error bars represent standard deviation (n = 3).



**7. Fluorescence image of compound 6YT activated by endogenous  $\text{H}_2\text{O}_2$  in different cell lines.**

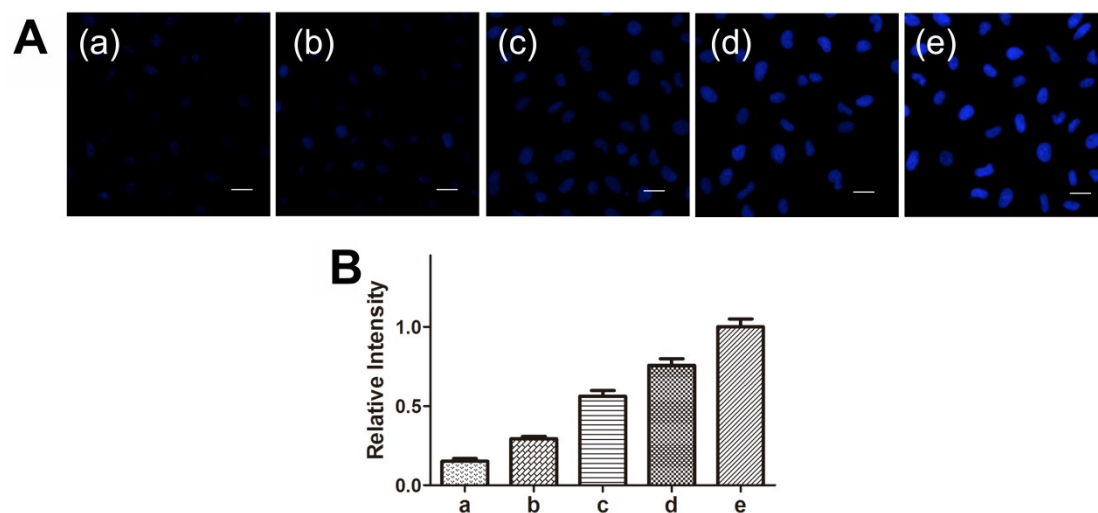

**Figure S12.** (A) Fluorescence images of A549 cell lines incubated with compound **6YT** (10  $\mu\text{M}$ ) for (a)0h, (b)2 h, (c)4h, (d)8h and (e)12h. Scale bar = 20  $\mu\text{m}$ . (B) The relative fluorescence intensity of a-e were measured at three regions in each dish. Error bars represent standard deviation ( $n = 3$ ).

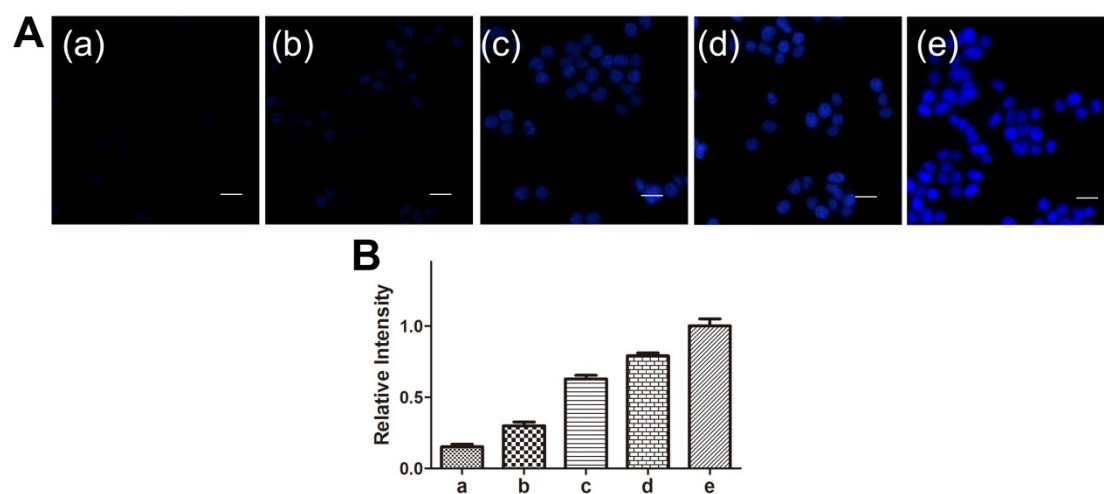

**Figure S13.** (A) Fluorescence images of HCT-116 cell lines incubated with

compound **6YT** (10  $\mu$ M) for (a)0h, (b)2 h, (c)4h, (d)8h and (e)12h. Scale bar = 20  $\mu$ m. (B) The relative fluorescence intensity of a-e were measured at three regions in each dish. Error bars represent standard deviation (n = 3).

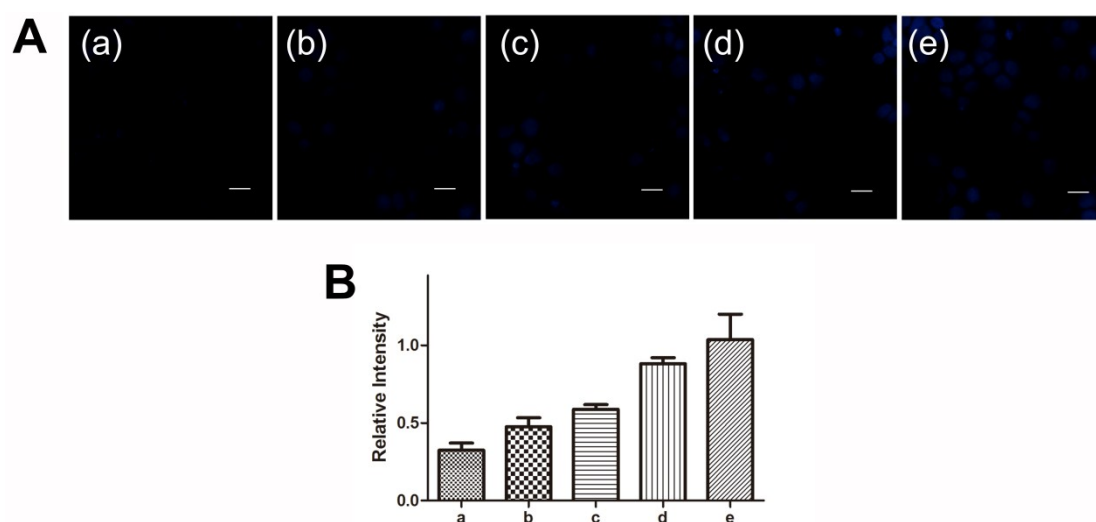

**Figure S14.** (A) Fluorescence images of MCF-10A cell lines incubated with compound **6YT** (10  $\mu$ M) for (a)0h, (b)2 h, (c)4h, (d)8h and (e)12h. Scale bar = 20  $\mu$ m. (B) The relative fluorescence intensity of a-e were measured at three regions in each dish. Error bars represent standard deviation (n = 3).

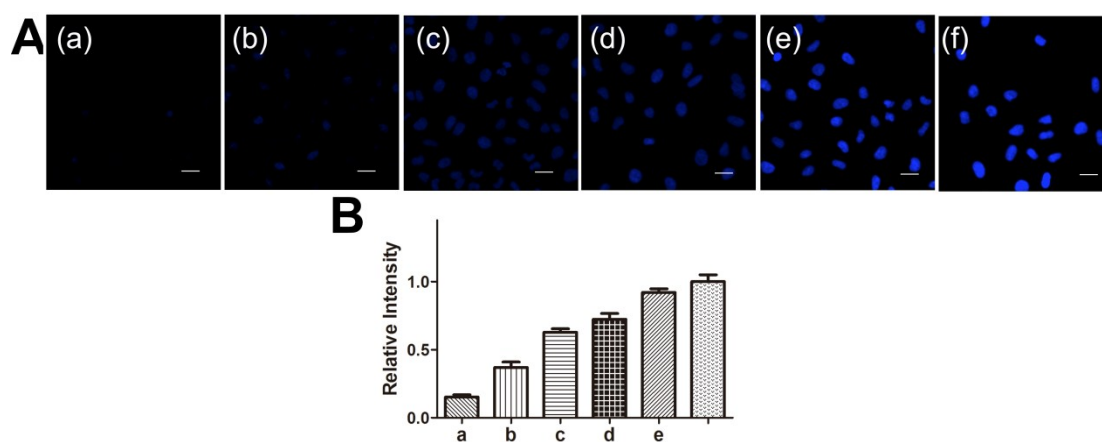

**Figure S15.** (A) Fluorescence images of A549 cell lines incubated with

increasing concentration of compound **6YT** (a)0 $\mu$ M, (b)1.25 $\mu$ M, (c)2.5 $\mu$ M, (d)5 $\mu$ M, (e)10 $\mu$ M and (f)20 $\mu$ M for 12h. Scale bar = 20  $\mu$ m. (B) The relative fluorescence intensity of a-f were measured at three regions in each dish. Error bars represent standard deviation (n = 3).
